# Supplementary material
Source: HighWire-hosted journal article supplement (https://www.jrheum.org/highwire/filestream/32727/field_highwire_adjunct_files/0/170307Data_Suppl.pdf)

**ONLINE SUPPLEMENTARY DATA**

**Supplementary Table 1.** All-cause 5-year healthcare costs for incident systemic sclerosis patients, systemic sclerosis patients with incident interstitial lung disease, and systemic sclerosis patients with incident pulmonary arterial hypertension (mutually exclusive cohorts).

|                           | Incident SSc<br>N=1,753              | SSc with<br>Incident ILD*<br>N=60     | SSc with<br>Incident PAH<br>N=21      |
|---------------------------|--------------------------------------|---------------------------------------|---------------------------------------|
| Mean (SD)<br>Costs        | \$93,912<br>(\$152,282)              | \$216,045<br>(\$374,092)              | \$215,538<br>(\$206,321)              |
| 95% CI around<br>the mean | \$86,778-<br>\$101,045               | \$119,407-<br>\$312,683               | \$121,622-<br>\$309,454               |
| Median (IQR)              | \$52,337<br>(\$28,308-<br>\$101,348) | \$101,889<br>(\$65,037-<br>\$232,210) | \$157,764<br>(\$82,136-<br>\$251,131) |

\*Significantly different from the incident SSc patients using *t*-test and non-parametric tests.

No statistical comparisons were done with the SSc with incident PAH group because of small sample sizes.

Costs were adjusted to 2014 US \$.

CI, confidence interval; ILD, interstitial lung disease; IQR, interquartile range; PAH, pulmonary arterial hypertension; SD, standard deviation; SSc, systemic sclerosis.

**Supplementary Table 2.** All-cause healthcare costs and utilization for incident systemic sclerosis patients (N=1,957) by year over 5 years of follow-up.

|                      | Year 1                | Year 2                | Year 3                | Year 4                | Year 5                |
|----------------------|-----------------------|-----------------------|-----------------------|-----------------------|-----------------------|
|                      |                       |                       |                       |                       |                       |
| Inpatient admissions | 287<br>(15%)          | 288<br>(15%)          | 257<br>(13%)          | 297<br>(15%)          | 316<br>(16%)          |
| Mean (SD) Costs      | \$4,691<br>(\$30,235) | \$3,780<br>(\$25,011) | \$3,770<br>(\$20,907) | \$4,492<br>(\$21,732) | \$6,101<br>(\$42,813) |

|                           |                            |                          |                          |                          |                          |
|---------------------------|----------------------------|--------------------------|--------------------------|--------------------------|--------------------------|
| 95% CI around the mean    | \$3,351-\$6,031            | \$2,672-\$4,889          | \$2,843-\$4,697          | \$3,528-\$5,455          | \$4,203-\$7,999          |
| Median (IQR)              | \$0<br>(\$0-\$0)           | \$0<br>(\$0-\$0)         | \$0<br>(\$0-\$0)         | \$0<br>(\$0-\$0)         | \$0<br>(\$0-\$0)         |
| Emergency room visits     | 480<br>(25%)               | 449<br>(23%)             | 479<br>(24%)             | 482<br>(25%)             | 485<br>(25%)             |
| Mean (SD) Costs           | \$337<br>(\$2,915)         | \$290<br>(\$1,353)       | \$290<br>(\$1,372)       | \$311<br>(\$1,312)       | \$261<br>(\$988)         |
| 95% CI around the mean    | \$207-\$466                | \$230-\$350              | \$229-\$351              | \$253-\$369              | \$218-\$305              |
| Median (IQR)              | \$0<br>(\$0-\$0)           | \$0<br>(\$0-\$0)         | \$0<br>(\$0-\$0)         | \$0<br>(\$0-\$0)         | \$0<br>(\$0-\$0)         |
| Outpatient office visits  | 1,942<br>(99%)             | 1,904<br>(97%)           | 1,899<br>(97%)           | 1,884<br>(96%)           | 1,885<br>(96%)           |
| Mean (SD) Costs           | \$1,392<br>(\$1,739)       | \$1,164<br>(\$1,742)     | \$1,153<br>(\$2,066)     | \$1,168<br>(\$1,825)     | \$1,173<br>(\$1,778)     |
| 95% CI around the mean    | \$1,315-\$1,469            | \$1,087-\$1,242          | \$1,062-\$1,245          | \$1,087-\$1,249          | \$1,094-\$1,251          |
| Median (IQR)              | \$1,092<br>(\$665-\$1,768) | \$860<br>(\$485-\$1,475) | \$841<br>(\$476-\$1,437) | \$859<br>(\$456-\$1,481) | \$856<br>(\$476-\$1,452) |
| Other outpatient services | 1,942<br>(99%)             | 1,916<br>(98%)           | 1,908<br>(97%)           | 1,895<br>(97%)           | 1,896<br>(97%)           |

|                                  |                                    |                                   |                                   |                                   |                                   |
|----------------------------------|------------------------------------|-----------------------------------|-----------------------------------|-----------------------------------|-----------------------------------|
| Mean (SD) Costs                  | \$9,060<br>(\$24,174)              | \$7,779<br>(\$20,213)             | \$7,327<br>(\$15,363)             | \$7,869<br>(\$17,161)             | \$8,677<br>(\$19,660)             |
| 95% CI around the mean           | \$7,989-<br>\$10,132               | \$6,883-<br>\$8,675               | \$6,646-<br>\$8,008               | \$7,108-<br>\$8,629               | \$7,806-<br>\$9,549               |
| Median (IQR)                     | \$3,972<br>(\$1,663-<br>\$8,911)   | \$3,377<br>(\$1,125-<br>\$7,435)  | \$2,997<br>(\$1,004-<br>\$7,527)  | \$3,172<br>(\$1,167-<br>\$7,851)  | \$3,202<br>(\$1,094-<br>\$8,250)  |
| Outpatient pharmacy              | 1,904<br>(97%)                     | 1,897<br>(97%)                    | 1,878<br>(96%)                    | 1,883<br>(96%)                    | 1,878<br>(96%)                    |
| Mean (SD) Costs                  | \$5,418<br>(\$9,359)               | \$5,822<br>(\$10,715)             | \$5,973<br>(\$11,565)             | \$6,486<br>(\$13,691)             | \$7,055<br>(\$17,593)             |
| 95% CI around the mean           | \$5,003-<br>\$5,833                | \$5,347-<br>\$6,297               | \$5,460-<br>\$6,485               | \$5,879-<br>\$7,093               | \$6,275-<br>\$7,835               |
| Median (IQR)                     | \$2,911<br>(\$1,194-<br>\$5,916)   | \$2,850<br>(\$1,037-<br>\$6,237)  | \$2,842<br>(\$941-<br>\$6,042)    | \$2,745<br>(\$887-<br>\$6,027)    | \$2,540<br>(\$756-<br>\$5,931)    |
| Mean (SD) total healthcare costs | \$20,898<br>(\$45,958)             | \$18,836<br>(\$41,476)            | \$18,513<br>(\$34,681)            | \$20,325<br>(\$37,521)            | \$23,268<br>(\$59,129)            |
| 95% CI around the mean           | \$18,860-<br>\$22,935              | \$16,997-<br>\$20,674             | \$16,975-<br>\$20,050             | \$18,662-<br>\$21,989             | \$20,646-<br>\$25,889             |
| Median (IQR)                     | \$10,152<br>(\$5,119-<br>\$20,347) | \$9,072<br>(\$4,333-<br>\$19,042) | \$8,561<br>(\$4,111-<br>\$19,151) | \$8,623<br>(\$4,163-<br>\$20,401) | \$8,870<br>(\$3,845-<br>\$20,971) |

Costs were adjusted to 2014 US \$.

CI, confidence interval; IQR, interquartile range; SD, standard deviation.

**Supplementary Table 3.** All-cause healthcare costs and utilization for systemic sclerosis patients with incident interstitial lung disease (N=219) by year over 5 years of follow-up.

|                          | Year 1                 | Year 2                 | Year 3                | Year 4                 | Year 5                  |
|--------------------------|------------------------|------------------------|-----------------------|------------------------|-------------------------|
| Inpatient admissions     | 46 (21%)               | 38 (17%)               | 26 (12%)              | 42 (19%)               | 52 (24%)                |
| Mean (SD) Costs          | \$7,693<br>(\$35,008)  | \$7,643<br>(\$44,068)  | \$3,502<br>(\$19,894) | \$7,735<br>(\$37,133)  | \$22,609<br>(\$137,314) |
| 95% CI around the mean   | \$3,031-<br>\$12,356   | \$1,774-<br>\$13,512   | \$853-<br>\$6,152     | \$2,790-<br>\$12,681   | \$4,322-<br>\$40,897    |
| Median (IQR)             | \$0<br>(\$0-\$0)       | \$0<br>(\$0-\$0)       | \$0<br>(\$0-\$0)      | \$0<br>(\$0-\$0)       | \$0<br>(\$0-\$0)        |
| Emergency room visits    | 59 (27%)               | 66 (30%)               | 59 (27%)              | 63 (29%)               | 74 (34%)                |
| Mean (SD) Costs          | \$450<br>(\$1,640)     | \$474<br>(\$1,660)     | \$461<br>(\$3,045)    | \$425<br>(\$2,878)     | \$344<br>(\$981)        |
| 95% CI around the mean   | \$231-<br>\$668        | \$253-<br>\$696        | \$56-\$867            | \$42-\$808             | \$213-\$475             |
| Median (IQR)             | \$0<br>(\$0-<br>\$128) | \$0<br>(\$0-<br>\$206) | \$0<br>(\$0-\$95)     | \$0<br>(\$0-<br>\$170) | \$0<br>(\$0-\$201)      |
| Outpatient office visits | 219<br>(100%)          | 216<br>(99%)           | 216<br>(99%)          | 215<br>(98%)           | 215<br>(98%)            |
| Mean (SD) Costs          | \$1,794<br>(\$1,114)   | \$1,410<br>(\$942)     | \$1,458<br>(\$1,133)  | \$1,455<br>(\$1,082)   | \$1,567<br>(\$1,324)    |

|                                  |                               |                               |                               |                               |                               |
|----------------------------------|-------------------------------|-------------------------------|-------------------------------|-------------------------------|-------------------------------|
| 95% CI around the mean           | \$1,645-\$1,942               | \$1,284-\$1,535               | \$1,307-\$1,609               | \$1,311-\$1,599               | \$1,390-\$1,743               |
| Median (IQR)                     | \$1,553<br>(\$943-\$2,432)    | \$1,195<br>(\$698-\$1,905)    | \$1,191<br>(\$653-\$1,947)    | 1,176<br>(\$730-\$1,954)      | \$1,274<br>(\$714-\$2,022)    |
| Other outpatient services        | 219<br>(100%)                 | 216<br>(99%)                  | 216<br>(99%)                  | 216<br>(99%)                  | 216 (99%)                     |
| Mean (SD) Costs                  | \$14,051<br>(\$29,227)        | \$13,375<br>(\$45,449)        | \$12,387<br>(\$32,053)        | \$9,485<br>(\$12,672)         | \$14,578<br>(\$28,228)        |
| 95% CI around the mean           | \$10,159-\$17,944             | \$7,322-\$19,428              | \$8,118-\$16,656              | \$7,797-\$11,172              | \$10,819-\$18,338             |
| Median (IQR)                     | \$8,340<br>(\$3,743-\$16,515) | \$5,700<br>(\$2,333-\$12,163) | \$5,440<br>(\$2,188-\$11,814) | \$5,091<br>(\$2,009-\$11,745) | \$5,846<br>(\$2,282-\$14,276) |
| Outpatient pharmacy              | 217<br>(99%)                  | 214<br>(98%)                  | 212<br>(97%)                  | 211<br>(96%)                  | 213 (97%)                     |
| Mean (SD) Costs                  | \$11,260<br>(\$17,773)        | \$13,013<br>(\$20,857)        | \$13,476<br>(\$24,024)        | \$14,112<br>(\$24,758)        | \$16,348<br>(\$31,967)        |
| 95% CI around the mean           | \$8,893-\$13,627              | \$10,235-\$15,791             | \$10,276-\$16,675             | \$10,815-\$17,409             | \$12,091-\$20,605             |
| Median (IQR)                     | \$5,101<br>(\$2,124-\$11,826) | \$4,874<br>(\$1,881-\$13,507) | \$4,718<br>(\$1,949-\$12,712) | \$4,803<br>(\$1,991-\$14,742) | \$4,456<br>(\$1,560-\$12,202) |
| Mean (SD) total healthcare costs | \$35,248<br>(\$67,535)        | \$35,916<br>(\$81,073)        | \$31,285<br>(\$55,403)        | \$33,212<br>(\$56,549)        | \$55,446<br>(\$160,237)       |

|                        |                                         |                                        |                                        |                                        |                                        |
|------------------------|-----------------------------------------|----------------------------------------|----------------------------------------|----------------------------------------|----------------------------------------|
| 95% CI around the mean | \$26,254-<br>\$44,243                   | \$25,118-<br>\$46,713                  | \$23,906-<br>\$38,663                  | \$25,681-<br>\$40,744                  | \$34,106-<br>\$76,787                  |
| Median (IQR)           | \$18,953<br><br>(\$10,702-<br>\$32,748) | \$16,686<br><br>(\$7,391-<br>\$34,428) | \$15,020<br><br>(\$7,078-<br>\$35,021) | \$13,924<br><br>(\$6,905-<br>\$37,880) | \$17,580<br><br>(\$7,658-<br>\$39,485) |

Costs were adjusted to 2014 US \$.

CI, confidence interval; IQR, interquartile range; SD, standard deviation.

**Supplementary Table 4.** All-cause healthcare costs and utilization for systemic sclerosis patients with incident pulmonary arterial hypertension (N=108) by year over 5 years of follow-up.

|                        | Year 1                       | Year 2                    | Year 3                    | Year 4                    | Year 5                       |
|------------------------|------------------------------|---------------------------|---------------------------|---------------------------|------------------------------|
| Inpatient admissions   | 34 (31%)                     | 21 (19%)                  | 24 (22%)                  | 25 (23%)                  | 32 (30%)                     |
| Mean (SD) costs        | \$9,203<br><br>(\$30,863)    | \$5,383<br><br>(\$18,152) | \$5,641<br><br>(\$18,349) | \$8,317<br><br>(\$30,768) | \$12,413<br><br>(\$61,974)   |
| 95% CI around the mean | \$3,316-<br>\$15,091         | \$1,920-<br>\$8,846       | \$2,141-<br>\$9,141       | \$2,448-<br>\$14,186      | \$591-<br>\$24,235           |
| Median (IQR)           | \$0<br><br>(\$0-<br>\$6,607) | \$0<br><br>(\$0-\$0)      | \$0<br><br>(\$0-\$0)      | \$0<br><br>(\$0-\$0)      | \$0<br><br>(\$0-<br>\$4,734) |
| Emergency room visits  | 39 (36%)                     | 35 (32%)                  | 36 (33%)                  | 36 (33%)                  | 36 (33%)                     |
| Mean (SD) costs        | \$789<br><br>(\$2,723)       | \$703<br><br>(\$4,281)    | \$785<br><br>(\$4,227)    | \$347<br><br>(\$876)      | \$365<br><br>(\$1,026)       |
| 95% CI around the mean | \$269-<br>\$1,308            | \$-114-<br>\$1,519        | \$-22-<br>\$1,591         | \$180-<br>\$514           | \$169-<br>\$561              |

|                           |                                |                               |                               |                               |                               |
|---------------------------|--------------------------------|-------------------------------|-------------------------------|-------------------------------|-------------------------------|
| Median (IQR)              | \$0<br>(\$0-\$234)             | \$0<br>(\$0-\$220)            | \$0<br>(\$0-\$257)            | \$0<br>(\$0-\$191)            | \$0<br>(\$0-\$282)            |
| Outpatient office visits  | 108<br>(100%)                  | 106<br>(98%)                  | 105<br>(97%)                  | 105<br>(97%)                  | 103<br>(95%)                  |
| Mean (SD) costs           | \$1,912<br>(\$1,157)           | \$1,640<br>(\$1,167)          | \$1,508<br>(\$1,349)          | \$1,594<br>(\$1,319)          | \$1,579<br>(\$1,378)          |
| 95% CI around the mean    | \$1,691-\$2,132                | \$1,417-\$1,862               | \$1,250-\$1,765               | \$1,343-\$1,846               | \$1,316-\$1,842               |
| Median (IQR)              | \$1,754<br>(\$1,116-\$2,496)   | \$1,449<br>(\$887-\$2,124)    | \$1,221<br>(\$710-\$1,918)    | \$1,199<br>(\$696-\$2,255)    | \$1,292<br>(\$549-\$2,113)    |
| Other outpatient services | 108<br>(100%)                  | 105<br>(97%)                  | 106<br>(98%)                  | 105<br>(97%)                  | 105<br>(97%)                  |
| Mean (SD) costs           | \$17,355<br>(\$22,291)         | \$12,984<br>(\$20,862)        | \$9,850<br>(\$13,808)         | \$13,565<br>(\$20,448)        | \$18,002<br>(\$35,562)        |
| 95% CI around the mean    | \$13,103-\$21,608              | \$9,005-\$16,964              | \$7,217-\$12,484              | \$9,665-\$17,466              | \$11,218-\$24,785             |
| Median (IQR)              | \$10,790<br>(\$6,374-\$18,557) | \$6,219<br>(\$3,091-\$13,649) | \$5,470<br>(\$2,649-\$10,796) | \$6,633<br>(\$3,173-\$16,165) | \$7,205<br>(\$2,464-\$15,388) |
| Outpatient pharmacy       | 107<br>(99%)                   | 105<br>(97%)                  | 103<br>(95%)                  | 105<br>(97%)                  | 106<br>(98%)                  |
| Mean (SD) costs           | \$20,769<br>(\$24,306)         | \$24,294<br>(\$30,577)        | \$26,671<br>(\$33,606)        | \$27,796<br>(\$34,607)        | \$30,962<br>(\$37,476)        |

|                                  |                                 |                                 |                                 |                                |                                 |
|----------------------------------|---------------------------------|---------------------------------|---------------------------------|--------------------------------|---------------------------------|
| 95% CI around the mean           | \$16,132-\$25,405               | \$18,462-\$30,127               | \$20,260-\$33,081               | \$21,195-\$34,398              | \$23,813-\$38,110               |
| Median (IQR)                     | \$8,537<br>(\$3,203-\$29,922)   | \$8,249<br>(\$3,567-\$33,120)   | \$10,900<br>(\$3,063-\$39,975)  | \$9,677<br>(\$3,029-\$39,700)  | \$12,356<br>(\$2,639-\$70,530)  |
| Mean (SD) total healthcare costs | \$50,028<br>(\$55,334)          | \$45,003<br>(\$51,658)          | \$44,454<br>(\$43,827)          | \$51,620<br>(\$55,463)         | \$63,320<br>(\$98,531)          |
| 95% CI around the mean           | \$39,473-\$60,583               | \$35,149-\$54,858               | \$36,094-\$52,814               | \$41,040-\$62,199              | \$44,524-\$82,115               |
| Median (IQR)                     | \$33,273<br>(\$16,912-\$63,278) | \$25,490<br>(\$10,880-\$70,186) | \$24,106<br>(\$11,030-\$77,373) | \$32,511<br>(\$9,437-\$74,692) | \$37,174<br>(\$11,368-\$88,168) |

Costs were adjusted to 2014 US \$.

CI, confidence interval; IQR, interquartile range; SD, standard deviation.



**Supplementary Figure 1.**

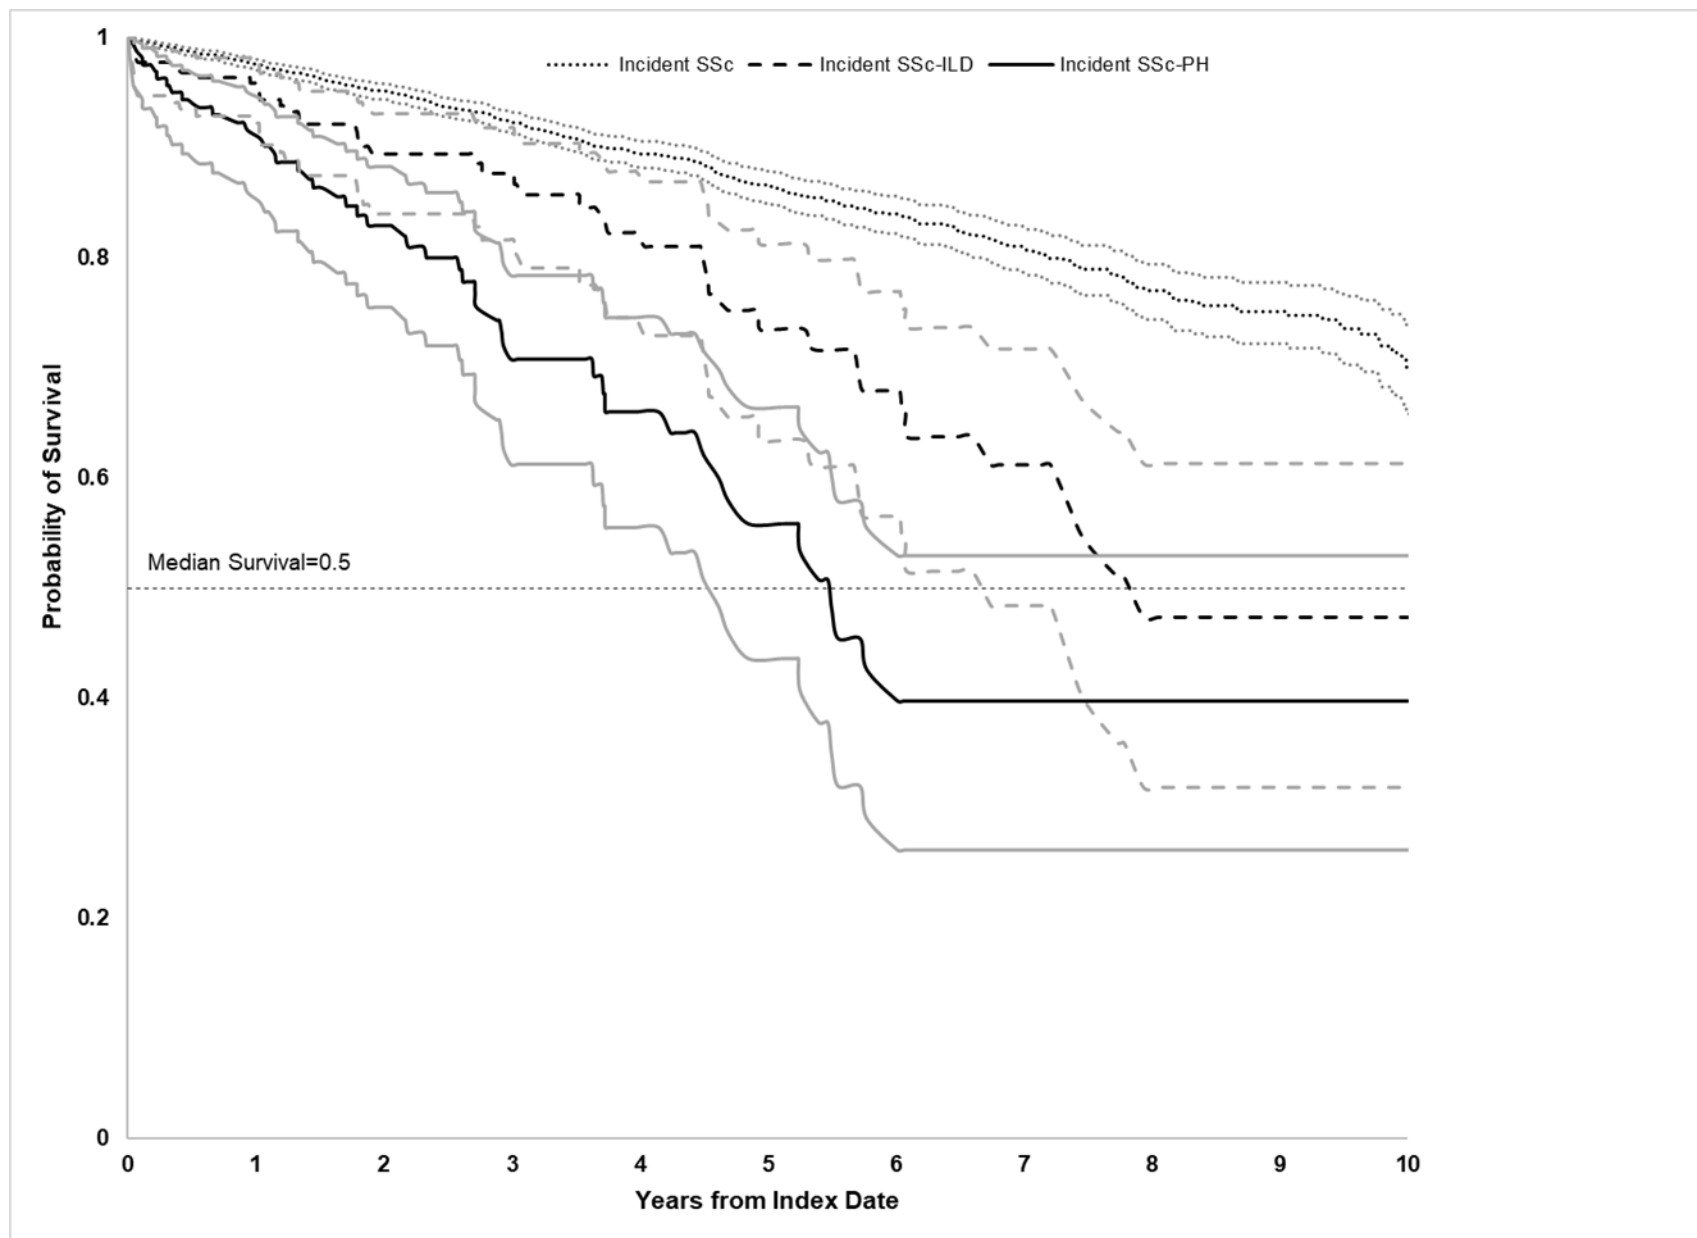

Supplement: 170307Data_Suppl.pdf [file 170307Data_Suppl.pdf]
